# Supplementary material for: Intriguingly tuning the fluorescence of AIEgen using responsive polyelectrolyte microspheres
Source: Royal Society of Chemistry journal article supplement (doi:10.1039/c6ra23380e), 2016-01-01
Supplement: c6ra23380e1.pdf [file c6ra23380e1.pdf]

## Electronic Supplementary Information

### Intriguingly Tuning fluorescence of AIEgen Using Responsive Polyelectrolyte Microspheres

Xiaolin Guan,<sup>a</sup> Donghai Zhang<sup>a</sup>, Tianming Jia,<sup>a</sup> Yang Zhang,<sup>a</sup> Li Meng,<sup>a</sup> Qijun Jin,<sup>a</sup>

Hengchang Ma,<sup>a</sup> Dedai Lu,<sup>a</sup> Shoujun Lai<sup>b</sup> and Ziqiang Lei<sup>a\*</sup>

<sup>a</sup> Key Laboratory of Eco-Environment-Related Polymer Materials Ministry of Education, Key Laboratory of Polymer Materials Ministry of Gansu Province, College of Chemistry and Chemical Engineering, Northwest Normal University, Lanzhou, Gansu 730070, P.R. China.

<sup>b</sup> School of Chemical Engineering, Lanzhou University of Arts and Science, Lanzhou, Gansu 730070, P.R. China.

#### Contents:

**Fig. S1** FTIR spectrum of TPE- PMETAC.

**Fig. S2** GPC spectrum of TPE-PMETAC.

**Table S1** GPC data of TPE-PMETAC.

**Fig. S3** <sup>1</sup>H NMR spectra of TPE-OH in *d*-DMSO at room temperature.

**Fig. S4** <sup>13</sup>C NMR spectra of TPE-OH in *d*-DMSO at room temperature.

**Fig. S5** MS spectra of TPE-OH.

**Fig. S6** <sup>1</sup>H NMR spectra of TPE-BMP in CDCl<sub>3</sub> at room temperature.

**Fig. S7** <sup>13</sup>C NMR spectra of TPE-BMP in CDCl<sub>3</sub> at room temperature.

**Fig. S8** MS spectra of TPE-BMP.

**Fig. S9** Concentration-dependent UV–vis spectra of (a) TPE- PMETAC aqueous, and mixture solution of 1 mg/mL TPE-PMETAC with (b) ClO<sub>4</sub><sup>-</sup>; (c) PF<sub>6</sub><sup>-</sup> and (d)TFSI<sup>-</sup>.

**Fig. S10** Particle sizes of 1mg/mL TPE-PMETAC with different volume fraction of

THF.

**Fig. S11** Particle sizes of 1mg/mL TPE-PMETAC with addition of different counterions.

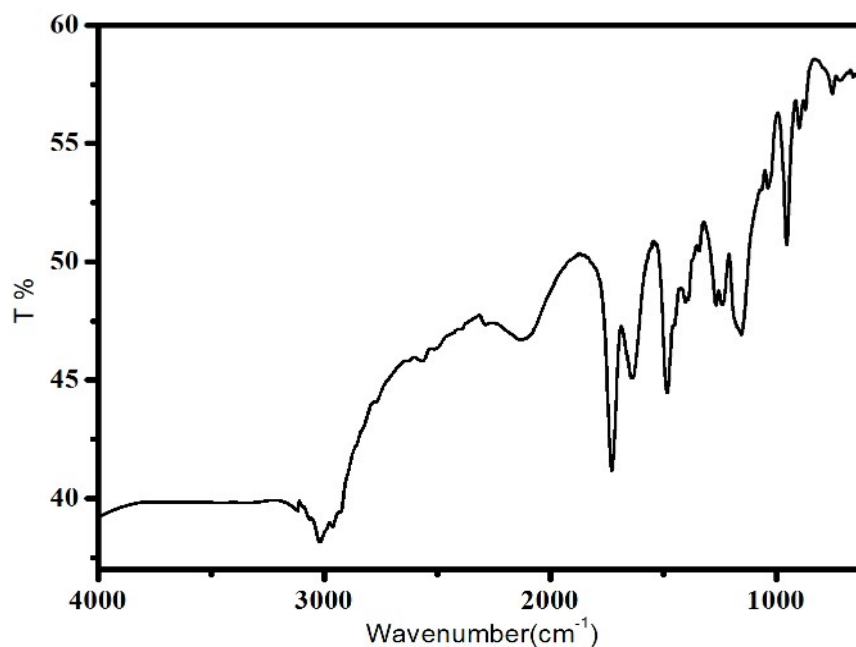

Fig.S1 FTIR spectrum of TPE- PMETAC.

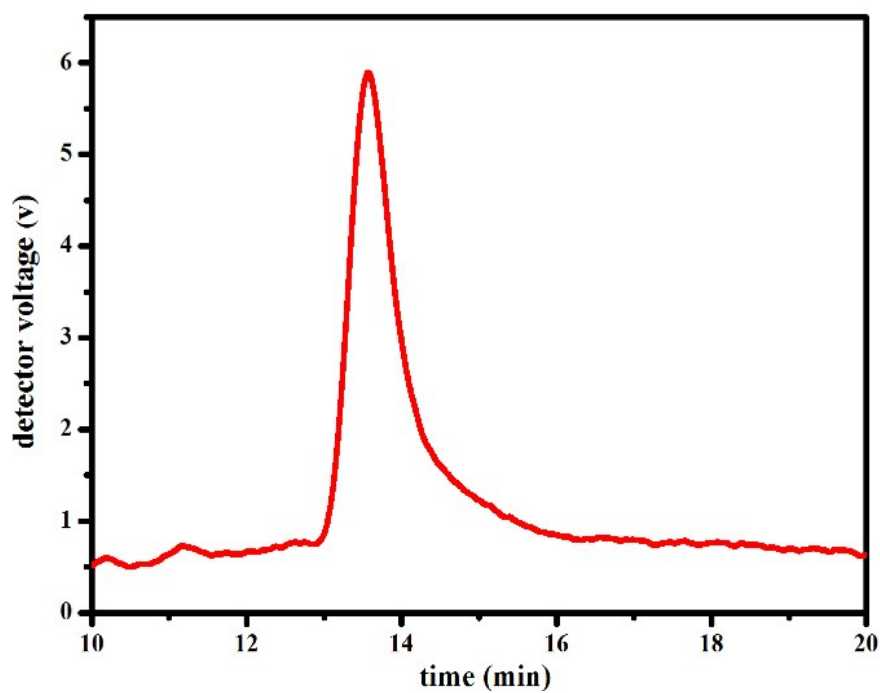

Fig. S2 GPC spectrum of TPE-PMETAC.

Table S1 GPC data of TPE-PMETAC.

| Mn                | Mp                | Mw                | Mz                | Polydispersity |
|-------------------|-------------------|-------------------|-------------------|----------------|
| $2.7 \times 10^4$ | $2.1 \times 10^4$ | $3.3 \times 10^4$ | $4.7 \times 10^4$ | 1.224          |

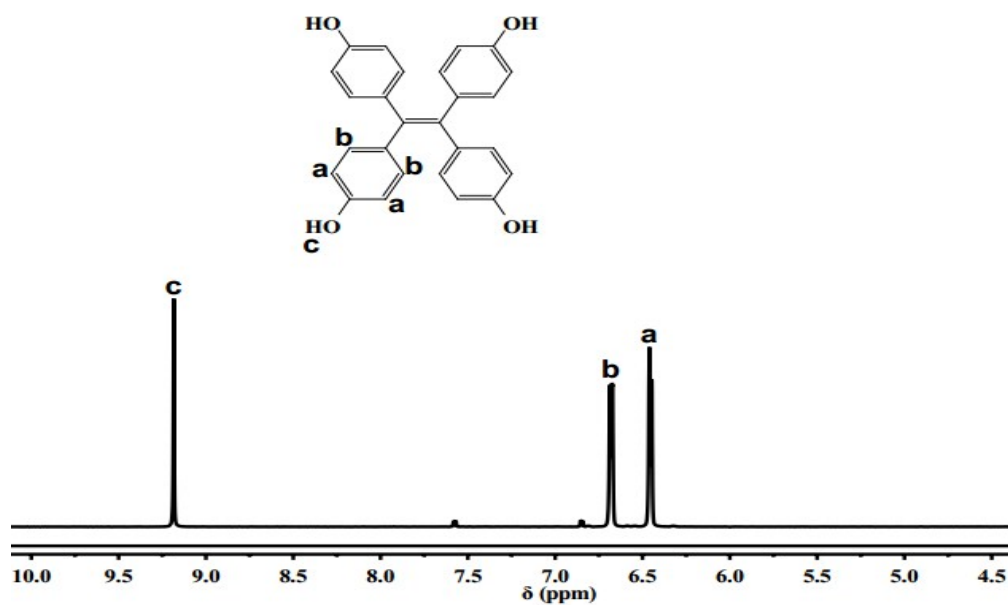

Fig. S3 <sup>1</sup>H NMR spectra of TPE-OH in *d*-DMSO at room temperature.

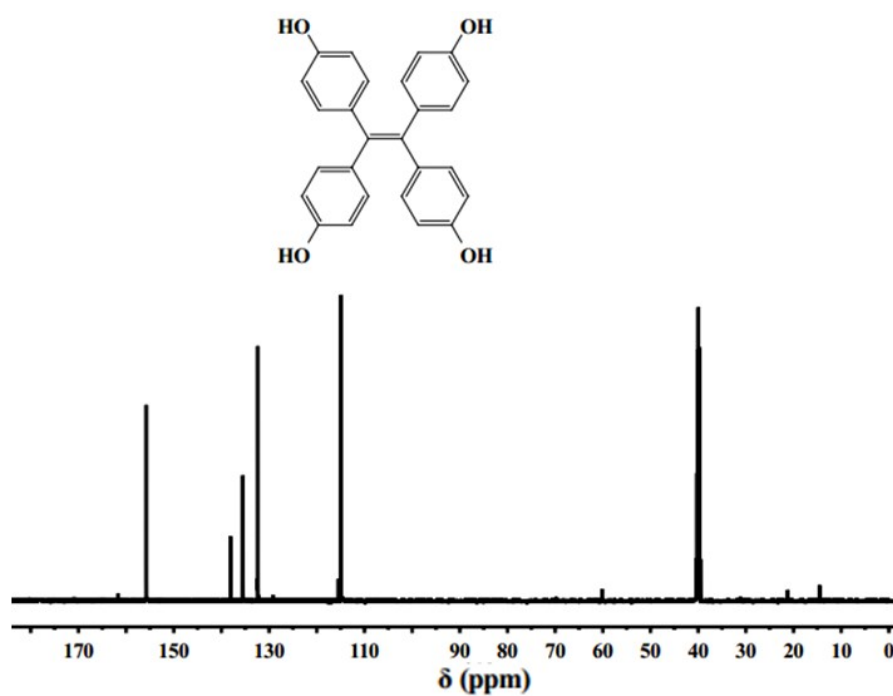

Fig. S4. <sup>13</sup>C NMR spectra of TPE-OH in *d*-DMSO at room temperature.

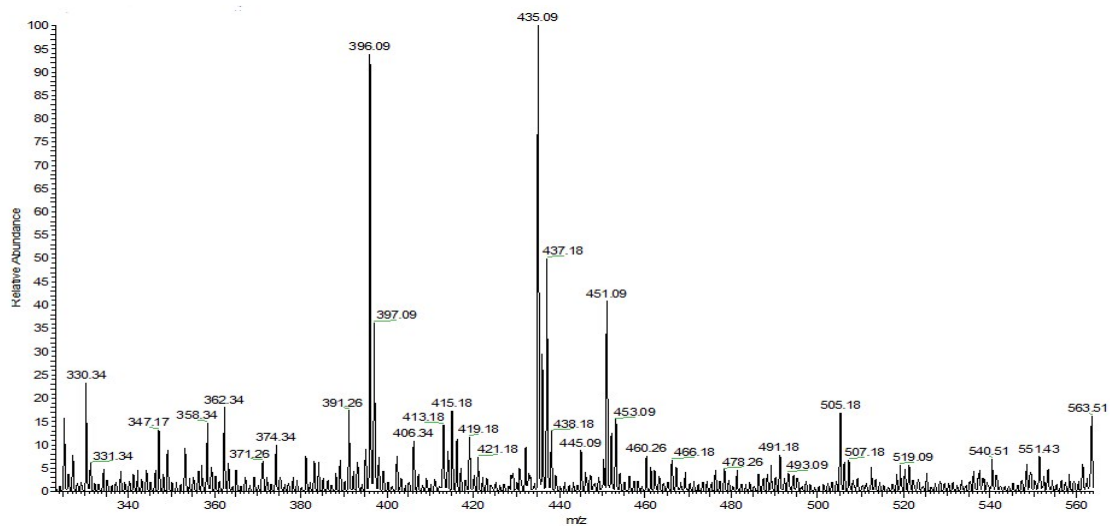

Fig. S5 MS spectra of TPE-OH.

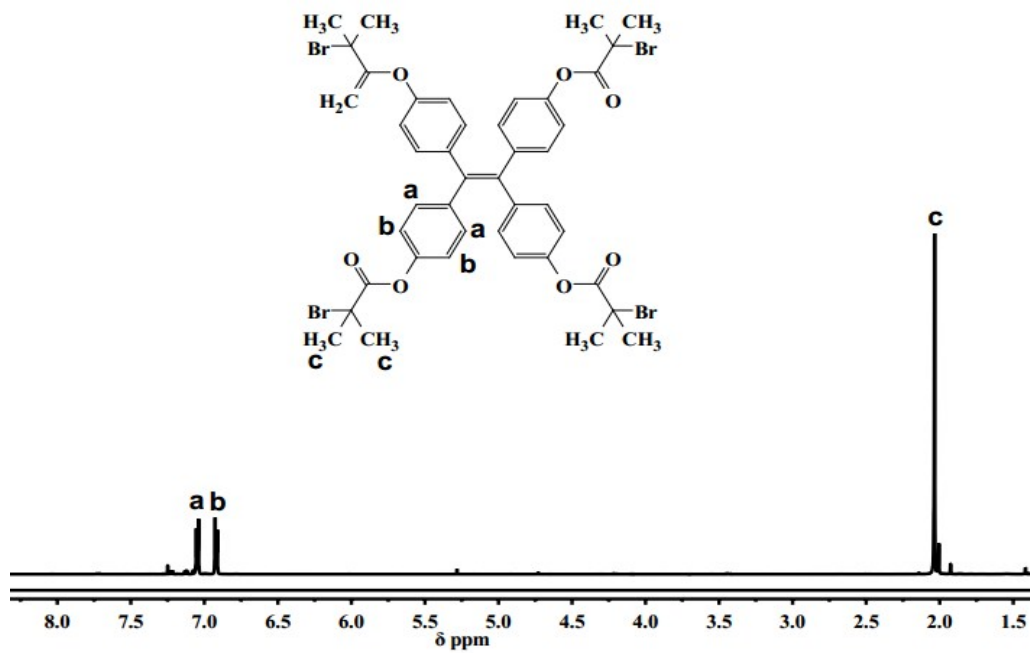

Fig. S6  $^1\text{H}$  NMR spectra of TPE-BMP in  $\text{CDCl}_3$  at room temperature.

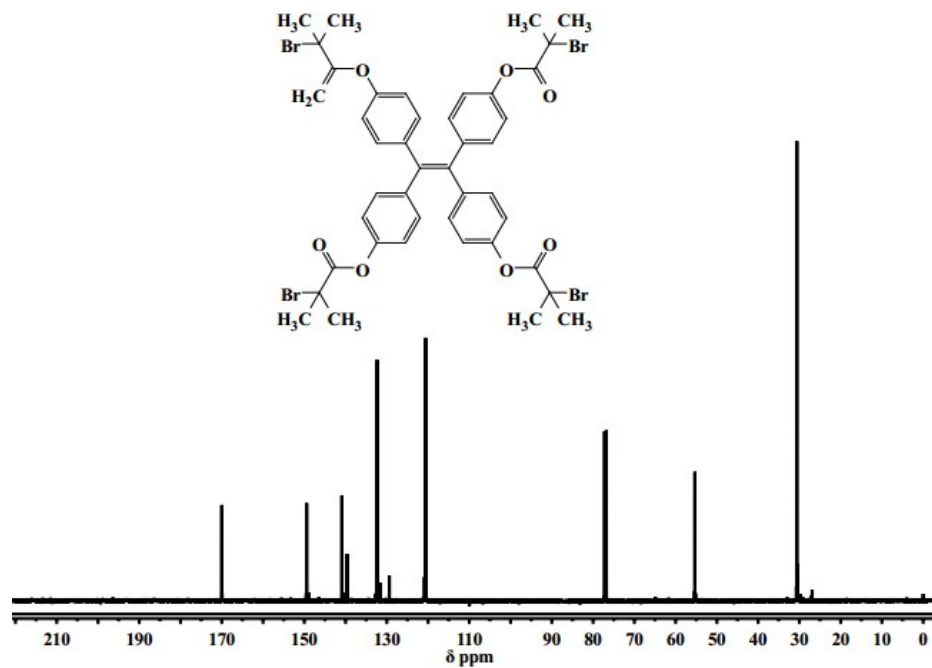

Fig. S7  $^{13}\text{C}$  NMR spectra of TPE-BMP in  $\text{CDCl}_3$  at room temperature.

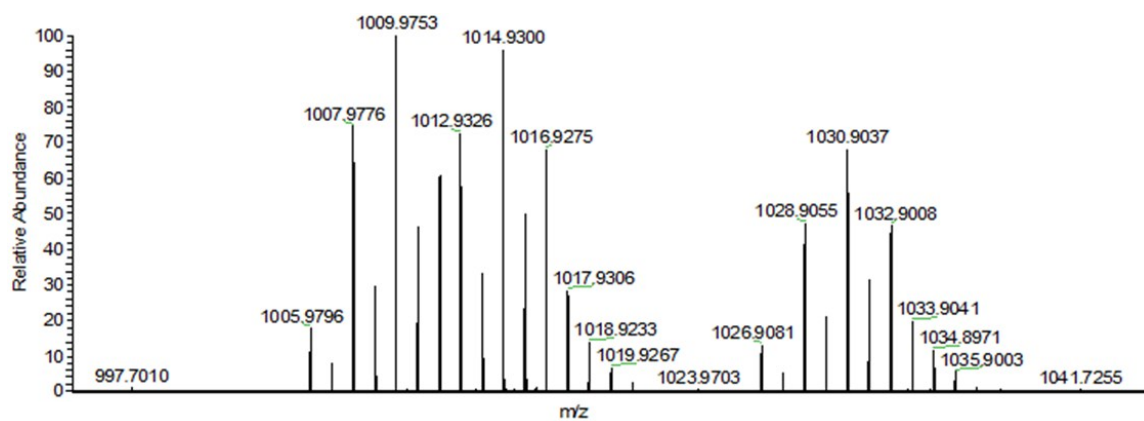

Fig. S8 MS spectra of TPE-BMP.

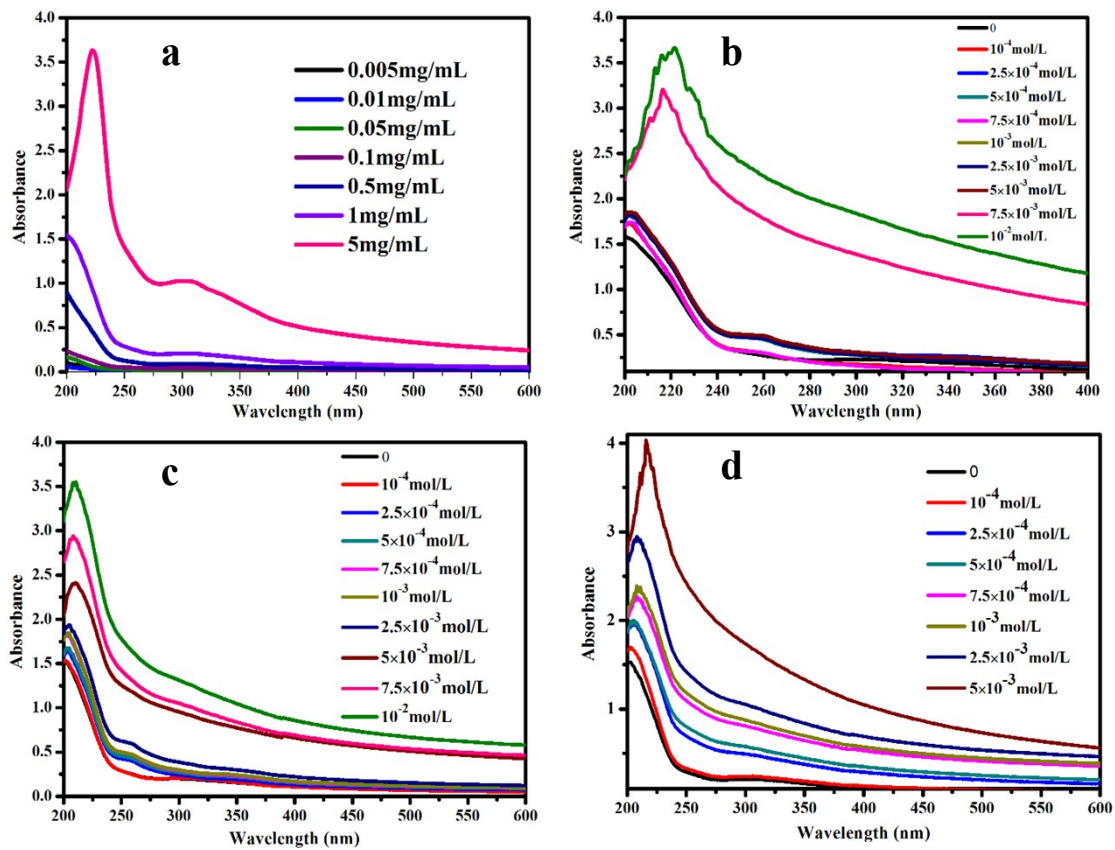

Fig. S9 Concentration-dependent UV-vis spectra of (a) TPE-PMETAC aqueous, and mixture solution of 1 mg/mL TPE-PMETAC with (b)  $\text{ClO}_4^-$ ; (c)  $\text{PF}_6^-$  and (d) TFSI<sup>-</sup>.

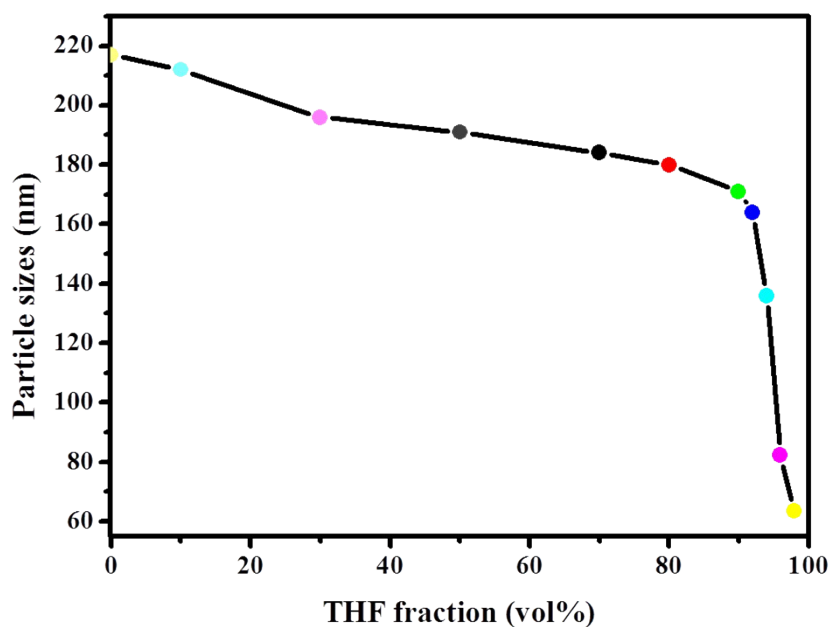

Fig. S10 Particle sizes of 1mg/mL TPE-PMETAC with different volume fraction of THF.

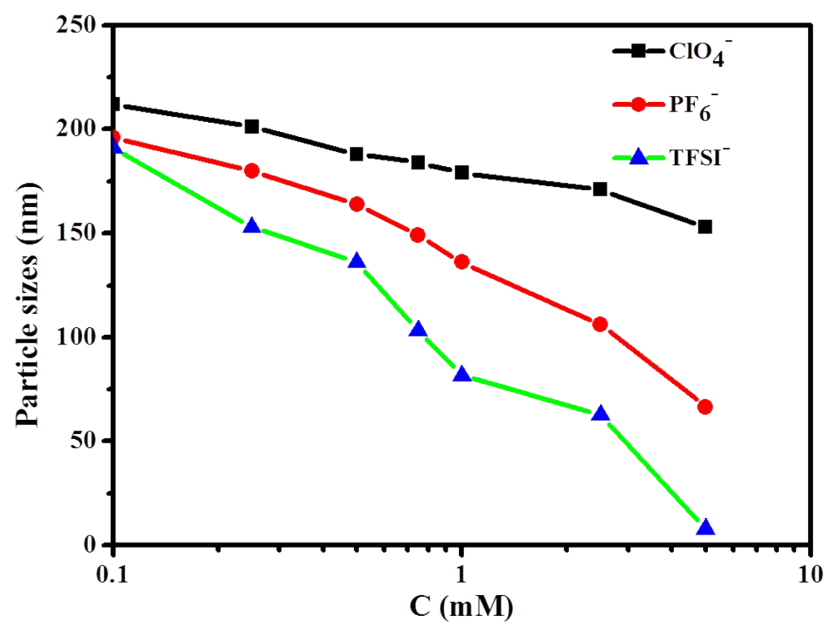

Fig. S11 Particle sizes of 1mg/mL TPE-PMETAC with addition of different counterions.
